# 1 *Analyzing the determinants for using health research evidence* 2 *in health planning in Tanzania: a cross-sectional study.*

3 Pius Kagoma\*<sup>1&2</sup>, Richard Mongi<sup>1</sup>, Albino Kalolo<sup>3,4</sup>

4 <sup>1</sup>*Department of Public Health and Community Nursing, the University of Dodoma, Dodoma,*  
5 *Tanzania;*

6 <sup>2</sup>*Division of Health, Social Welfare and Nutrition Services, President's Office-Regional*  
7 *Administration Local Government, Dodoma, Tanzania;*

8 <sup>3</sup>*Department of Public Health, St. Francis University College of Health and Allied Sciences,*  
9 *Morogoro, Tanzania;*

10 <sup>4</sup>*Centre for Reforms, Innovation, Health Policies, and Implementation Research,*  
11 *Dodoma, Tanzania.*

12 \*Corresponding author: Pius Kagoma; +255 (0) 76 5909942; P.O. Box 1923 Dodoma, Tanzania;  
13 [piuskagoma@gmail.com](mailto:piuskagoma@gmail.com)

14 Richard Mongi; +255 (0) 67 6953510; P.O. Box 259, Dodoma, Tanzania;  
15 [richiemongi@gmail.com](mailto:richiemongi@gmail.com)

16 Albino Kalolo; +255 (0) 764340819; P.O. Box 175, Ifakara, Morogoro, Tanzania;  
17 [kaloloa@gmail.com](mailto:kaloloa@gmail.com)

## 18 **Abstract**

19 **Introduction:** Achieving Universal Health Coverage (UHC) requires utilizing research  
20 evidence to inform the decision-making process. However, little information is available on the  
21 determinants for using research evidence in planning in Lower Middle-Income Countries  
22 (LMICs), including Tanzania. This paper aims to investigate the determinants of using health  
23 research evidence in health planning in Tanzania.

24  
25 **Materials and methods:** This study employed a cross-sectional study design. Data on health  
26 research evidence and its determinants were collected using a structured questionnaire from 422  
27 respondents from 9 regions of Tanzania from October to December 2023. The data were

28 analyzed using STATA version 18 for descriptive and inferential statistics. The association  
29 between variables was determined using a chi-square test at a 95% confidence level.

30 **Results:** The study revealed that 66.2% of participants strongly agreed to use health research  
31 evidence during planning. However, significant barriers were identified, including lack of  
32 dissemination (74.5%), inadequate human and non-human resources (70.0%), and insufficient  
33 knowledge and training in research (63.7%). A chi-square test confirmed significant associations  
34 between these barriers and the reduced use of research evidence ( $p<0.05$ ). Conversely, more than  
35 70% of respondents identified opportunities such as the availability of research coordinators,  
36 university partnerships, available research budgets, and internet access, all significantly  
37 associated with increased health research evidence use. More than 50% of participants reported  
38 motivational factors that like continuous quality improvement agenda in the healthcare sector,  
39 availability of short and long-term courses, on-the-job training, and provision of incentives like  
40 extra duty allowances were positively linked to research utilization.

41 **Conclusion:** The study found that 66.2% of participants used health research evidence in  
42 planning, but barriers like lack of dissemination, resource shortages, and inadequate training  
43 persisted. Interventions should focus on improving dissemination, resources, and training. Future  
44 research should explore strategies for enhancing these interventions.

45 **Keywords:** Determinants, Research evidence use, Health planning, Tanzania.  
46  
47

## 48 INTRODUCTION

49 Health research evidence plays an essential role in shaping effective health policies and  
50 interventions, which are crucial for improving public health outcomes (1). In resource-limited  
51 settings like Tanzania, where health challenges are complex and resources are constrained, the  
52 strategic use of research evidence is particularly important. It can guide decision-makers in  
53 identifying priority areas, optimizing resource allocation, and implementing interventions that  
54 are both cost-effective and impactful. Moreover, the use of evidence can help health planning  
55 teams avoid repeating past failures and introduce innovative solutions (2). Despite its recognized

56 importance, the extent to which health research evidence is utilized by health planning teams in  
57 Tanzania remains unclear. Understanding the factors that influence this utilization is essential for  
58 promoting evidence-based decision-making, which is critical for achieving the ambitious health  
59 targets set forth in the Sustainable Development Goals (SDGs), particularly Universal Health  
60 Coverage (UHC)(3).

61 Efforts to promote the integration of research evidence into health planning and decision-making  
62 have been made in various settings. These include the establishment of knowledge translation  
63 platforms, research dissemination strategies, health conferences, and capacity-building initiatives  
64 targeting health planning teams. However, the success of these efforts varies significantly across  
65 contexts, largely depending on factors such as institutional support, the capacity of the health  
66 workforce, and access to reliable data. In Tanzania, while some initiatives aim to bridge the gap  
67 between research and practice, the actual impact of these efforts on health planning remains  
68 under-explored.

69 Research across different settings has demonstrated that the use of health research evidence in  
70 decision-making is influenced by a variety of factors. These include organizational culture, the  
71 availability of resources, the expertise of the planning teams, and access to research outputs [4].  
72 In a study conducted by Kagoma et al (4), it was found that health planning teams in Tanzania  
73 consist of professionals from various disciplines, including Administrators (9%), Medical  
74 doctors (25.36%), Nurses (23.46%), Laboratory scientists (8.53%), Pharmacists (6.64%),  
75 Radiographers (1.66%), Environmental health officers (3.08%), Nutrition officers (3.08%),  
76 Social welfare officers (4.74%), and others (14.46%). Their primary responsibility is to plan,  
77 implement, and evaluate health interventions [4]. However, several factors may limit their ability  
78 to fully integrate research evidence into their work (5). These include inadequate dissemination  
79 of research findings, lack of access to research evidence, limited skills in interpreting research  
80 data, and insufficient organizational support (3,6–8).

81 While previous studies have explored various factors influencing the use of health research  
82 evidence in policy and planning, there remains a gap in understanding the specific determinants  
83 that affect the utilization of health research evidence among health planning teams in  
84 Tanzania(4,9). This study seeks to fill this gap by analyzing the key factors that influence

85 evidence use among these teams at both the regional and council levels, guided by the COM-B  
86 Model (Capability, Opportunity, and Motivation) as the theoretical framework (10), which has  
87 been widely used in understanding evidence-based decision-making processes. The COM-B  
88 model is particularly suited to the Tanzanian context because it focuses on the essential  
89 components of behavior change Capability, Opportunity, and Motivation which are critical for  
90 understanding and addressing the factors influencing the use of health research evidence by  
91 planning teams. By examining these elements, the model helps identify specific barriers and  
92 enablers that can be targeted to improve evidence-based decision-making in Tanzania's resource-  
93 limited. By applying this theoretical lens, the study aims to provide a deeper understanding of the  
94 barriers and facilitators to using research evidence in health planning, with the following specific  
95 objectives: 1) Analyze the current usage of health research evidence among planning team  
96 members at the regional and council levels, 2) Analyze the capacity of health planning team  
97 members to utilize health research evidence, 3) Identify opportunities for enhancing the use of  
98 health research evidence in health planning, 4) Identify opportunities for enhancing the use of  
99 health research evidence in health planning, 5) Explore the motivations for using health research  
100 evidence among health planning members at both regional and council levels. The findings of  
101 this study are expected to contribute to the development of strategies that enhance the integration  
102 of research evidence into health planning processes, ultimately leading to more effective health  
103 interventions and improved health outcomes in Tanzania.

## 104 **Conceptual framework**

105 The conceptual framework for this study was developed after several consultative meetings with  
106 different stakeholders and researchers. The theory was adopted and modified from the  
107 (Capability, Opportunity, and Motivation) COM-B model. The COM- B Model at the center of a  
108 proposed framework is a behavior system involving three essential conditions: Capability,  
109 Opportunity, and Motivation, what we term the 'COM-B system(10,11). This study investigated  
110 how the capability, opportunity, and motivation determinants can influence the behavior of the  
111 use of health research evidence during health planning as shown in Figure 1

112

113

114 .....

115

Insert figure 1

116 .....

117

**Figure 1:** The domains of the COM-B Model modified from Michie et al.,2011(10)

118

## Materials and Methods

119

### Study setting

120

This study was conducted between October and December 2023 in the United Republic of Tanzania, a Lower and Middle low-income country located in East Africa, with a population of about 62 million people. The allocated budget for the country’s Ministry of Health in 2023/2024 was estimated to be 443.6 million US dollars, with 1.2 million US dollars (0.27%) allocated for evidence production. The health research evidence users in Tanzania involve three important Ministries, namely; the Ministry of Health (MoH), The President’s Office Regional Administration and Local Government (PO-RALG), and Health management. The health evidence producers in Tanzania are the National Institute for Medical Research (NIMR), the Tanzania Commission for Science and Technology (COSTECH), Public and Private Universities, Health related institutions or authorities, local and international non-governmental organizations (NGOs), and civil society organizations as shown in Table 1.

131

132

**Table 1: A list of health research evidence producers and users in Tanzania**

133

134

| SN | Evidence users                                                  |
|----|-----------------------------------------------------------------|
| 1  | Ministry of Health                                              |
| 2  | President’s Office Regional Administration and Local Government |
| 3  | Ministry of Education Science and Technology (MEST)             |
| 4  | Prime Minister’s Office                                         |
| 5  | Regional Health Management Teams                                |

|                           |                                                                                                                                                                                                                                                                                                                                                                                |
|---------------------------|--------------------------------------------------------------------------------------------------------------------------------------------------------------------------------------------------------------------------------------------------------------------------------------------------------------------------------------------------------------------------------|
| 6                         | Council Health Management Teams                                                                                                                                                                                                                                                                                                                                                |
| 7                         | Healthcare workers                                                                                                                                                                                                                                                                                                                                                             |
| 8                         | Non-Governmental Organizations (NGOs)                                                                                                                                                                                                                                                                                                                                          |
| 9                         | Civil Society Organizations (CSOs)                                                                                                                                                                                                                                                                                                                                             |
| 10                        | Private Sector                                                                                                                                                                                                                                                                                                                                                                 |
| <b>Evidence producers</b> |                                                                                                                                                                                                                                                                                                                                                                                |
| 1                         | National Institute for Medical Research (NIMR)                                                                                                                                                                                                                                                                                                                                 |
| 2                         | Tanzania Commission for Science and Technology (COSTECH)                                                                                                                                                                                                                                                                                                                       |
| 3                         | Public Universities; The Muhimbili University of Health and Allied Sciences (MUHAS), University of Dar es Salaam (UDSM), University of Dodoma (UDOM)                                                                                                                                                                                                                           |
| 4                         | Private Universities; Catholic University of Health and Allied Sciences (CUHAS), Kilimanjaro Christian Medical Centre (KCMC), Hubert Kairuki Memorial University (HKMU), St. John's University of Tanzania (SJUT), St. Augustine University of Tanzania (SAUT), Kampala International University (KIU), St. Francis University College of Health and Allied Sciences (SFUCHAS) |
| 5                         | Kilimanjaro Clinical Research Institute (KCRI)                                                                                                                                                                                                                                                                                                                                 |
| 6                         | Ifakara Health Institute (IHI)                                                                                                                                                                                                                                                                                                                                                 |
| 7                         | Non-Governmental Organizations (NGOs)                                                                                                                                                                                                                                                                                                                                          |
| 8                         | Civil society organizations (CSOs)                                                                                                                                                                                                                                                                                                                                             |
| 9                         | Private sector                                                                                                                                                                                                                                                                                                                                                                 |

135

136

### 137 **The study sites**

138 The study site was eighteen (18) Councils of the Local Government Authorities within the nine  
139 (9) regions out of 26 Regions of Tanzania Mainland from nine (9) geographical zones as  
140 summarized in Table 2 and Figure 2. The nine zones are selected to seek the country's  
141 geographical representation. Together, these regions have a total population of 21,119,700,  
142 which represents 35.7% of the Tanzanian population. These regions are heterogeneous in  
143 population size, distribution of health facilities, human resources for health, and institutions  
144 carrying out health research activities. A similar approach has been used in major Tanzanian  
145 health studies(4,5,12); This approach provided a comprehensive understanding of the status quo  
146 for the use of health research evidence in health planning, and heterogeneous study population

147 for random sampling hence acting as a representative snapshot of all regions in Tanzania. The  
 148 study was conducted in 63 randomly selected health facilities, nine (9) Regional Referral  
 149 Hospitals (RRHs), eighteen (18) District Hospitals (DHs), Eighteen (18) Health Centres (HCs),  
 150 and eighteen (18) Dispensaries. To ensure the inclusion of urban and rural health facilities,  
 151 stratification was conducted followed by random sampling.

152  
 153  
 154  
 155  
 156

157 **Table 2:** Summary of study sites

| ZONE               | REGION        | COUNCIL             |
|--------------------|---------------|---------------------|
| Northern           |               | Siha District       |
|                    | Kilimanjaro   | Moshi Municipal     |
| Central zone       |               | Chamwino District   |
|                    | Dodoma        | Dodoma City         |
| Dar es Salaam      |               | Kigamboni Municipal |
|                    | Dar es Salaam | Dar es Salaam City  |
| Eastern            |               | Morogoro Municipal  |
|                    | Morogoro      | Gairo District      |
| Western            |               | Kigoma District     |
|                    | Kigoma        | Kigoma Municipal    |
| Southwest highland |               | Mbeya City          |
|                    | Mbeya         | Kyela District      |
| Lake               |               | Kwimba District     |
|                    | Mwanza        | Mwanza City         |
| Southern           |               | Mtwara Municipal    |
|                    | Mtwara        | Nanyamba            |
| Southern Highland  | Iringa        | Iringa Municipal    |
|                    |               | Iringa District     |

158  
 159  
 160 .....

161 Insert figure 2

162 .....

163 **Figure 2:** Distribution of sampled facilities by zones, regions, and districts

164

## 165 **The health planning landscape in Tanzania**

166 The health planning process in Tanzania is conducted at two levels; At the Council level, the  
167 health facility prepares its plans as well and the Council Health Management Team (CHMT)  
168 prepares its plan, whereby plans from the facility and CHMT are later consolidated to form  
169 Comprehensive Council plan (CCHP). The preparation of health facility plans is guided by the  
170 Health facility planning guidelines and CCHP guidelines.(13). At the regional level, the Regional  
171 Health Management Teams (RHMTs) prepare their plans using the RHMT planning guide and the  
172 Regional Referral Hospitals (RRHs) plans using the Comprehensive Operational Plan Guide  
173 (CHOP)(14). When the plans are completed are sent to the Ministry of Health and President’s  
174 Office-Regional Administration and Local Government for final assessment before being sent to  
175 the Ministry of Finance for funding. At all levels, we are planning to use the guidelines and the  
176 routine data collected from each level.(14).

## 177 **Study Design**

178 The study adopts a quantitative cross-sectional design focusing on nine regions of Tanzania.  
179 (15,16).

## 180 **Sample size and Sampling procedures**

181 The sample size involved the health planning team members from the RRHs, DHs, HCs, and  
182 Dispensaries randomly selected from the nine regions. The sample size was 422 calculated from  
183 the Cochran formula (1977). To date, in Tanzania there is no cited reference for the percentage  
184 of the use of health research evidence in health planning therefore the marginal error of 50% was  
185 used (17).

$$n = \frac{Z^2 * p (1 - p)}{d^2} \text{ (Cochran (1977))}$$

186  
187

188 Where by

189 N-sample size



190 Z-confidence interval 95% 1.96, P-  
191 proportional from previous study d = margin  
192 of error, which is approximately 5% Thus,

$$193 \quad n = \frac{(1.96)^2 \times 50(100 - 50)}{(5)^2}$$

195 =384 including 10% of non-response sample 384 plus 10%=38+384=422

196

197 This study employed a multistage sampling technique for the selection of the study units as  
198 summarized in Figure 3. The sampling stages are zones, regions, councils, and public primary  
199 health facilities. The first stage was a random selection of one region from each of the nine  
200 Zones of the country. In the second stage, in each selected region, councils were clustered into  
201 rural and urban, and then one rural and one urban council will be selected from each region  
202 followed by a random selection of the health facilities, see Figure 3. The technique is convenient  
203 for studying large and diverse populations (5). The sampling stages were zones, regions,  
204 councils, and public primary health facilities.

205 .....

206 Insert figure 3

207 .....

208

## 209 **Variables and their measurements.**

### 210 **Dependent variable**

211 The dependent variable of this study i.e. the use of health research evidence was obtained from a  
212 set of four (4) questions that were measured. The questions were a mixture of binary and  
213 multiple-choice questions. Those questions were divided into four areas. The mean score was  
214 calculated from those sets of questions; the score had a value of 0 and 1. Those respondents who  
215 scored 1 were regarded to have used the health research evidence, while those who scored 0 were

216 regarded to have not used the health research evidence. For multiple choice questions, the  
217 respondents were provided with a set of predefined options, allowing them to select the one that  
218 best represents their response, which will capture varying degrees or categories on the use of  
219 health research evidence.

## 220 **Independent Variables**

221 The independent variables in this study encompass numerous factors including demographic  
222 information such as sex, age, and education level; professional attributes such as position within  
223 the health facility and years of schooling; and contextual elements including the type of health  
224 facility, stakeholders group represented district, and region. The study aimed to gain insights into  
225 the determinants that influence the use of health research evidence during health planning. The  
226 determinants had a combination of three constructs which are, capability determinants,  
227 opportunity determinants, and motivation determinants both derived from the COM-B Model.

228 **Capability determinants** were obtained from a set of twelve (12) Likert scale questions with a  
229 scale of 1 to 5 (1 = strongly agree, 2 = somewhat agree, 3 = neither agree nor disagree, 4 =  
230 somewhat disagree, 5 = strongly disagree) and one multiple choice question. The mean and  
231 standard deviation of the responses to assess central tendency and variability were calculated.  
232 For a multiple-choice question, the frequency distribution of each response category was  
233 analyzed. Additionally, a chi-square test was calculated to determine if the distribution of  
234 responses was significantly different from what would be expected by chance.

235 **Opportunity determinants**, were obtained from a set of seventeen (17) Likert scale questions  
236 with a scale of 1 to 5 (1 = strongly agree, 2 = somewhat agree, 3 = neither agree nor disagree, 4 =  
237 somewhat disagree, 5 = strongly disagree). We assigned numerical values (1 to 5) to these  
238 responses, where lower values indicate stronger agreement. Next, the mean or median was  
239 calculated of these numerical values to quantify the overall tendency. The multiple regression  
240 analysis was used to assess the relationship between the independent variable and dependent  
241 variables.

242 **Motivation determinants** were obtained from a set of eight (8) Likert scale questions with a  
243 scale of 1 to 5 (1 = strongly agree, 2 = somewhat agree, 3 = neither agree nor disagree, 4 =  
244 somewhat disagree, 5 = strongly disagree). We assigned numerical values (1 to 5) to these

245 responses, where lower values indicate stronger agreement. Next, the mean or median was  
246 calculated of these numerical values to quantify the overall tendency. The multiple regression  
247 analysis was used to assess the relationship between the independent variable and dependent  
248 variables.

## 249 **Data collection procedures and tools**

250 Quantitative data was collected face to face person by using the Swahili version of the survey  
251 after translation of the English version of the survey and document review checklist (see  
252 supplemental file) to planning team members at national, regional, council, and health facility  
253 levels. The questions from the tool were adopted and modified from previous studies (18,19).  
254 The survey collected information on the use of health research evidence and its determinants  
255 from the sampled participants using Open Data Kit software (ODK).

256 The document review checklist was used to guide the document review to see whether the  
257 available plans have any evidence of being prepared using health research evidence. The  
258 checklist contains a list of questions that will help the review of the plans made at the facility,  
259 council, regional, and national levels. The checklist is used to collect information on the  
260 available health plans if they are prepared by using health research evidence. Data was collected  
261 by a research assistant, who was trained for three days in data collection methods, tools, and  
262 ethics. They were selected according to their experience in the health system. Pilot testing of the  
263 tools was conducted at Dodoma RHMT and Chamwino District Council at Chamwino CHMT,  
264 Chamwino Council Hospital, Chamwino Health Centre, and Buigiri Dispensary to enhance the  
265 validity, reliability, and effectiveness of the tool in capturing the intended information.

## 266 **Data analysis**

267 Responses were reported on all survey items in all response categories and summarized using  
268 frequencies and percentages for categorical variables and means and standard deviation for non-  
269 categorical variables were computed. Given that the outcome variable had two categories  
270 (0=Negative, 1=Positive), A binary logistic regression model was used to assess factors  
271 associated with the perception of implementers on the prime vendor system. The model results  
272 are regression parameter estimates and odds ratios (OR). The data analysis was conducted using

273 STATA version 18, and the significance of all statistical tests was established at a 5%  
274 significance level.

275

### 276 **Data validity and reliability**

277 To ensure validity and reliability, the validity of quantitative data collection tools was reviewed  
278 by independent subject matter experts from the University of Dodoma (UDOM). The reliability  
279 assessment of the questionnaire was done using the internal consistency test, with the alpha  
280 reliability coefficient being the statistic. (20,21). The range of the alpha coefficient, also known  
281 as Cronbach's alpha was 0.71 acceptable to this study. Moreover, exploratory factor analysis to  
282 establish the construct validity of the questionnaire and pilot study conducted at Chamwino DC  
283 before field data collection to ensure clarity of the data collection tool.

284

### 285 **Ethics and Dissemination**

286 The study was granted ethical approval by the University of Dodoma Ethical Committee with  
287 **Ref. No. MA.84/261/102/A/64/91**. Permission to conduct the study and consent to participate  
288 in the study was sought from relevant authorities and participants, respectively. Participants  
289 received information about the purpose of the study and data protection. The findings of the  
290 study were disseminated to relevant stakeholders through collaborative communication with the  
291 Ministry of Health, RHMT/CHMT, Tanzania Health Summit as well as publications to target  
292 researchers, practitioners, implementers, and policymakers.

293

## 294 **Results**

295 The finding from this study is presented in three parts using tables, percentages, and charts, Part  
296 one shows the respondents' demographic characteristics and stakeholder group. Part two shows  
297 the proportion of the respondents who reported using Health research evidence in health  
298 planning and, part three shows the association between health research use in planning and the  
299 COM-B constructs (capability, Motivation, and opportunity).

### 300 **Demographic characteristics**

301 Table 1 describes the respondents' characteristics and the stakeholder group they represent.  
 302 There was an almost equal number of female 50.2 % and male 49.8% respondents with a mean  
 303 age of  $39.51 \pm 7.86$  years old. Most of them (42.7%) had undergraduate education followed by a  
 304 Diploma (36.3%) and less than one-third (14.0%) had a master's degree and above. Few (7.1%)  
 305 respondents 'had certificate-level education. Professional background results revealed that the  
 306 majority 107 (25.4%) of the respondents were medical doctors followed by nurses 99 (23.5%).  
 307 Physiotherapists and panning offices were very few each accounting for 0.24% of the  
 308 respondents.

309

310 Table 3: Demographic characteristics of respondents

| <b>Variable</b>                | <b>Frequency</b> | <b>Percent</b> | <b>Mean <math>\pm</math>SD</b> |
|--------------------------------|------------------|----------------|--------------------------------|
| <b>Age</b>                     |                  |                | 39.51 $\pm$ 7.86               |
| <25                            | 3                | 0.7            |                                |
| 26-35                          | 159              | 37.7           |                                |
| 36-45                          | 156              | 37.0           |                                |
| 46-55                          | 93               | 22.4           |                                |
| >46                            | 11               | 2.6            |                                |
| <b>Region</b>                  |                  |                |                                |
| Mbeya                          | 48               | 11.4           |                                |
| Dodoma                         | 50               | 11.9           |                                |
| Iringa                         | 41               | 9.7            |                                |
| Mtwara                         | 49               | 11.6           |                                |
| Mwanza                         | 50               | 11.85          |                                |
| Kigoma                         | 51               | 12.1           |                                |
| Kilimanjaro                    | 45               | 10.7           |                                |
| Morogoro                       | 48               | 11.4           |                                |
| Dar es salaam                  | 40               | 9.5            |                                |
| <b>Type of health facility</b> |                  |                |                                |
| Dispensary                     | 37               | 8.8            |                                |
| Health center                  | 82               | 19.4           |                                |
| Council Hospital               | 97               | 23.0           |                                |
| Regional referral hospital     | 81               | 19.2           |                                |
| RHMT                           | 87               | 20.6           |                                |
| CHMT                           | 38               | 9.0            |                                |
| <b>Gender</b>                  |                  |                |                                |
| Male                           | 210              | 49.76          |                                |
| Female                         | 212              | 50.24          |                                |
| <b>Professional background</b> |                  |                |                                |
| Doctor                         | 107              | 25.36          |                                |

|                                                         |     |       |            |
|---------------------------------------------------------|-----|-------|------------|
| Nurse                                                   | 99  | 23.46 |            |
| Laboratory scientist                                    | 36  | 8.53  |            |
| Pharmacist                                              | 28  | 6.64  |            |
| Radiographer                                            | 7   | 1.66  |            |
| Environmental Health officer                            | 13  | 3.08  |            |
| Nutrition officer                                       | 13  | 3.08  |            |
| Social Welfare Officer                                  | 20  | 4.74  |            |
| Physiotherapist                                         | 1   | 0.24  |            |
| Biomedical engineer                                     | 3   | 0.71  |            |
| Planning officer                                        | 1   | 0.24  |            |
| Health Secretary                                        | 38  | 9.00  |            |
| Other                                                   | 56  | 13.3  |            |
| <b>Stakeholders' group</b>                              |     |       |            |
| RHMT                                                    | 49  | 11.6  |            |
| HMT                                                     | 280 | 66.4  |            |
| CHMT                                                    | 90  | 21.3  |            |
| FBO                                                     | 1   | 0.2   |            |
| HGFC                                                    | 2   | 0.5   |            |
| <b>Highest level of education</b>                       |     |       |            |
| Certificate                                             | 30  | 7.1   |            |
| Diploma Certificate                                     | 153 | 36.3  |            |
| Undergraduate degree                                    | 180 | 42.7  |            |
| Master's Degree                                         | 56  | 13.3  |            |
| PhD                                                     | 3   | 0.7   |            |
| <b>The position holds currently in health planning.</b> |     |       |            |
| Chairperson                                             | 30  | 7.1   |            |
| Secretary                                               | 45  | 10.7  |            |
| Technical Advisor                                       | 11  | 2.6   |            |
| Member                                                  | 335 | 79.4  |            |
| Other                                                   | 1   | 0.2   |            |
| <b>Years participate</b>                                |     |       | 5.08 ±3.96 |
| <5                                                      | 283 | 67.1  |            |
| 6-10                                                    | 103 | 24.4  |            |
| >10                                                     | 36  | 8.5   |            |

311

## 312 **Proportion of the use of health research evidence**

313 **Table 4** provides data on the use of health research evidence in a particular context. It shows that  
 314 the majority of participants (96.7%) have used routine data, with 49.5% reporting a high extent  
 315 of use. Additionally, evidence from routine data was the most commonly used type of evidence  
 316 during health planning, with 98.8% of participants reporting its use. Most participants (66.2%)  
 317 have used health research evidence as shown in Figure 4, and a significant majority (98.8%)

318 have used health planning guidelines. Moreover, the majority of participants (98.8%) also  
 319 indicated the importance of the use of health research evidence, with 82.6% considering it very  
 320 important. These findings suggest a strong reliance on routine data and a high recognition of the  
 321 importance of health research evidence in the context studied.

322 Table 4: The proportion of the use of health research evidence during health planning

| Variable                                                                | Frequency | Percent |
|-------------------------------------------------------------------------|-----------|---------|
| <b>Ever used routine data</b>                                           |           |         |
| No                                                                      | 14        | 3.3     |
| Yes                                                                     | 408       | 96.7    |
| <b>Extent of use of routine data</b>                                    |           |         |
| Low                                                                     | 41        | 10.1    |
| Medium                                                                  | 165       | 40.4    |
| High                                                                    | 202       | 49.5    |
| <b>Type of evidence used during health planning (Multiple response)</b> |           |         |
| Evidence from routine data                                              | 403       | 98.8    |
| Policy documents                                                        | 280       | 68.6    |
| Research publications (general)                                         | 133       | 32.6    |
| Systematic reviews/ meta-analysis                                       | 41        | 10.1    |
| Randomized Control trials                                               | 17        | 4.2     |
| Experimental studies                                                    | 30        | 7.4     |
| Non-experimental studies                                                | 20        | 4.9     |
| Expert opinions                                                         | 271       | 66.4    |
| Policy beliefs                                                          | 162       | 39.7    |
| Other                                                                   | 17        | 4.2     |
| <b>Use of health research evidence</b>                                  |           |         |
| No                                                                      | 138       | 33.8    |
| Yes                                                                     | 270       | 66.2    |
| <b>Use of the Health planning guidelines</b>                            |           |         |
| No                                                                      | 5         | 1.2     |
| Yes                                                                     | 403       | 98.8    |
| <b>Use of the Ruling party manifesto</b>                                |           |         |
| No                                                                      | 44        | 10.8    |
| Yes                                                                     | 364       | 89.2    |
| <b>Use of the Policy documents</b>                                      |           |         |
| No                                                                      | 137       | 33.6    |
| Yes                                                                     | 271       | 66.4    |
| <b>Importance of the use of health research evidence</b>                |           |         |
| No                                                                      | 5         | 1.2     |
| Yes                                                                     | 403       | 98.8    |
| <b>Level of importance of the use of health research evidence</b>       |           |         |
| Very unimportant                                                        | 5         | 1.2     |
| Unimportant                                                             | 2         | 0.5     |

|                |     |      |
|----------------|-----|------|
| Neutral        | 14  | 3.4  |
| Important      | 50  | 12.3 |
| Very important | 337 | 82.6 |

323

324

325

326

.....

327

**Insert figure 4**

328

.....

329

330 **Figure 4:** Proportion of the use of health research evidence.

331 **The factors associated with the use of health research evidence during health**  
332 **planning.**

333 The table presents the results of a binary logistic regression analysis examining factors  
334 associated with the use of research evidence during health planning. The analysis includes  
335 variables such as age, region, type of health facility, gender, professional background,  
336 stakeholder group, highest level of education, position held in health planning, and years of  
337 participation. The adjusted odds ratios (OR), confidence intervals (CI), and p-values are provided  
338 to indicate the strength and statistical significance of associations.

339 *Significant Variables and Interpretation*

- 340 • **Region:** The analysis compares various regions to the reference category, Kilimanjaro.  
341 The odds ratios (OR) show how likely individuals from other regions are to use health  
342 research evidence in health planning compared to those from Kilimanjaro. For instance, if  
343 a region has an OR greater than 1, individuals from that region are more likely to use  
344 research evidence than those from Kilimanjaro. If the OR is less than 1, they are less  
345 likely. The p-values indicate whether these differences are statistically significant.



346 • **Level of Education:** Compared to individuals with a diploma (reference category), those  
347 with higher education levels were more likely to use research evidence:

348 ➤ Undergraduate degree (OR = 2.396, CI: [1.094, 5.249], p-value = 0.0290):  
349 Those with an undergraduate degree are over twice as likely to use  
350 research evidence compared to diploma holders.

351 ➤ Master's degree (OR = 2.278, CI: [0.921, 5.631], p-value = 0.0747):  
352 Similar to undergraduates, master's degree holders are also more likely to  
353 use research evidence in health planning although were not significant.

354 These OR values reflect the increased likelihood of individuals with higher education  
355 levels using research evidence compared to the reference group, with p-values indicating  
356 the strength of this relationship.

357 • **Years of Participation:**

358 ➤ 6–10 years (OR = 1.092, CI: [0.677,1.761], p-value = 0.7184): Individuals  
359 with 6–10 years of participation in health planning show a higher  
360 likelihood of using research evidence compared to those with fewer years,  
361 though this was not statistically significant.

362 ➤ More than 10 years (OR = 1.399, CI: [0.648,3.019], p-value = 0.3924):  
363 Those with over 10 years of participation have a 40% higher likelihood of  
364 using research evidence compared to those with fewer years of experience,  
365 and this difference was also not statistically significant.

366 The adjusted odds ratios reflect the likelihood of each category of the variable influencing the  
367 use of research evidence, controlling for other variables in the model. Significance is determined  
368 by both the size of the OR and the p-value, with confidence intervals providing a range within  
369 which the true effect likely falls.

370 Table 5: Binary logistic regression for factors associated with the use of research evidence during  
371 health planning.

372

| Variable                          | Not use   | Use       | Unadjusted logistic analysis |         | Adjusted logistic analysis |         |
|-----------------------------------|-----------|-----------|------------------------------|---------|----------------------------|---------|
|                                   | N (%)     | N (%)     | OR [95%CI]                   | p-value | OR [95%CI]                 | p-value |
| <b>Age</b>                        |           |           |                              |         |                            |         |
| <35                               | 52(32.1)  | 110(67.9) | ref                          |         |                            |         |
| 36-45                             | 56(35.9)  | 100(64.1) | 0.844[0.530,1.343]           | 0.4747  |                            |         |
| >45                               | 35(33.7)  | 69(66.4)  | 0.932[0.552,1.573]           | 0.7919  |                            |         |
| <b>Region</b>                     |           |           |                              |         |                            |         |
| Kilimanjaro                       | 26(57.8)  | 19(42.2)  | ref                          |         | ref                        |         |
| Mbeya                             | 17(35.4)  | 31(64.6)  | 2.495[1.081,5.760]           | 0.0322  | 2.604[1.074,6.315]         | 0.0342  |
| Dodoma                            | 17(34.0)  | 33(66.0)  | 2.656[1.156,6.104]           | 0.0214  | 2.514[1.053,6.001]         | 0.0378  |
| Iringa                            | 10(24.4)  | 31(75.6)  | 4.242[1.680,10.71]           | 0.0022  | 4.707[1.772,12.499]        | 0.0019  |
| Mtwara                            | 21(42.9)  | 28(57.1)  | 1.825[0.805,4.137]           | 0.1499  | 1.801[0.727,4.466]         | 0.2039  |
| Mwanza                            | 12(24.0)  | 38(76.0)  | 4.333[1.801,10.43]           | 0.0011  | 4.794[1.893,12.140]        | 0.0009  |
| Kigoma                            | 10(19.6)  | 41(80.4)  | 5.611[2.259,13.94]           | 0.0002  | 5.922[2.224,15.769]        | 0.0004  |
| Morogoro                          | 17(35.4)  | 31(64.6)  | 2.495[1.081,5.760]           | 0.0322  | 2.180[0.901,5.274]         | 0.0839  |
| Dar es salaam                     | 13(32.5)  | 27(67.5)  | 2.842[1.170,6.904]           | 0.0211  | 3.229[1.211,8.611]         | 0.0192  |
| <b>Type of health facility</b>    |           |           |                              |         |                            |         |
| Dispensary                        | 17(46.0)  | 20(54.1)  | ref                          |         | ref                        |         |
| Health center                     | 25(30.5)  | 57(69.5)  | 1.938[0.871,4.311]           | 0.1048  | 2.029[0.829,4.964]         | 0.1211  |
| Council Hospital                  | 45(46.4)  | 52(53.6)  | 0.982[0.459,2.100]           | 0.9631  | 0.809[0.323,2.026]         | 0.6511  |
| RRH                               | 19(23.5)  | 62(76.5)  | 2.774[1.214,6.335]           | 0.0155  | 2.663[1.895,7.920]         | 0.0383  |
| RHMT                              | 27(31.0)  | 60(69.0)  | 1.889[0.857,4.163]           | 0.1147  | 0.350[0.031,3.902]         | 0.3932  |
| CHMT                              | 10(26.3)  | 28(73.7)  | 2.380[0.903,6.273]           | 0.0795  | 5.647[0.602,52.94]         | 0.3167  |
| <b>Gender</b>                     |           |           |                              |         |                            |         |
| Male                              | 71(33.8)  | 139(66.2) | 1.007[0.673,1.507]           | 0.9736  |                            |         |
| Female                            | 72(34.0)  | 140(66.0) | ref                          |         |                            |         |
| <b>Professional background</b>    |           |           |                              |         |                            |         |
| Doctor                            | 37(34.6)  | 70(65.4)  | ref                          |         |                            |         |
| Nurse                             | 35(35.4)  | 64(64.7)  | 0.967[0.545,1.714]           | 0.9073  |                            |         |
| Lab scientist & Pharmacist        | 25(35.2)  | 46(64.8)  | 0.973[0.518,1.825]           | 0.9310  |                            |         |
| Non-medical                       | 28(31.5)  | 61(68.5)  | 1.152[0.633,2.096]           | 0.6444  |                            |         |
| Other                             | 18(32.1)  | 38(67.7)  | 1.116[0.561,2.220]           | 0.7548  |                            |         |
| <b>Stakeholders' group</b>        |           |           |                              |         |                            |         |
| RHMT                              | 13(26.5)  | 36(73.5)  | 1.609[0.816,3.171]           | 0.1697  | 0.843[0.177,4.012]         | 0.8297  |
| CHMT                              | 26(28.9)  | 64(71.1)  | 1.430[0.854,2.396]           | 0.1741  | 5.647[0.602,52.93]         | 0.1295  |
| HMT                               | 104(36.8) | 179(63.3) | ref                          |         | ref                        |         |
| <b>Highest level of education</b> |           |           |                              |         |                            |         |
| Certificate                       | 15(50.0)  | 15(50.0)  | ref                          |         | ref                        |         |
| Diploma                           | 57(37.3)  | 96(62.8)  | 1.684[0.767,3.700]           | 0.1943  | 1.609[0.670,3.867]         | 0.2874  |
| Undergraduate                     | 53(29.4)  | 127(70.6) | 2.396[1.094,5.249]           | 0.0290  | 1.824[0.710,4.685]         | 0.2120  |

|                                                    |           |           |                    |        |                    |        |
|----------------------------------------------------|-----------|-----------|--------------------|--------|--------------------|--------|
| Master's Degree                                    | 18(30.5)  | 41(69.5)  | 2.278[0.921,5.631] | 0.0747 | 2.082[0.684,6.337] | 0.1968 |
| <b>Position holds currently in health planning</b> |           |           |                    |        |                    |        |
| Secretary                                          | 19(42.2)  | 26(57.8)  | ref                |        | ref                |        |
| Chairperson                                        | 8(26.7)   | 22(73.3)  | 2.009[0.738,5.475] | 0.1724 | 1.933[0.647,5.780] | 0.2381 |
| Technical                                          | 4(36.4)   | 7(63.6)   | 1.279[0.327,5.000] | 0.7236 | 0.789[0.173,3.599] | 0.7600 |
| Member                                             | 112(33.3) | 224(66.7) | 1.462[0.776,2.754] | 0.2404 | 1.328[0.651,2.708] | 0.4354 |
| <b>Years participate</b>                           |           |           |                    |        |                    |        |
| <5                                                 | 99(35.0)  | 184(65.0) | ref                |        |                    |        |
| 6-10                                               | 34(33.0)  | 69(67.0)  | 1.092[0.677,1.761] | 0.7184 |                    |        |
| >10                                                | 10(27.8)  | 26(72.2)  | 1.399[0.648,3.019] | 0.3924 |                    |        |

373

374

375 **Capability: The knowledge and skills of health research evidence use**

376 Table 6 presents the findings from a survey on the capacity to use health research evidence  
 377 (knowledge and skills). Each row in the table represents a different variable related to the use of  
 378 health research evidence, and the columns display the responses categorized into five levels of  
 379 importance: Very Unimportant (VUIM), Unimportant (UIM), Neutral, Important (IM), and Very  
 380 Important (VIM).

381 From the data, it's clear that the majority of respondents perceive the use of health research  
 382 evidence as very important or important across the various variables. In the variable "Gives the  
 383 latest information," the majority of respondents rated it as Very Important (65.7%) or Important  
 384 (24.5%). Similarly, in the variable "Help the policymakers understand a specific problem," a  
 385 substantial proportion of respondents indicated that it is Very Important (66.7%) or Important  
 386 (24.3%). Overall, the data suggests that there is a strong recognition of the significance of health  
 387 research evidence in various aspects of policymaking and intervention implementation.

388

389 Table 6: Knowledge and skills of health research evidence use

| Variable                                            | VUIM n (%) | UIM n (%) | Neutral n (%) | IM n (%)   | VIM n (%) |
|-----------------------------------------------------|------------|-----------|---------------|------------|-----------|
| Gives the latest information                        | 5(1.2)     | 3(1.2)    | 32(7.8)       | 100(24.51) | 268(65.7) |
| Help the policymakers understand a specific problem | 3(0.7)     | 4(1.0)    | 30(7.4)       | 99(24.3)   | 272(66.7) |
| Help the policymakers to                            | 3(0.7)     | 5(1.2)    | 24(5.9)       | 113(27.7)  | 263(64.5) |

|                                         |        |        |         |           |           |
|-----------------------------------------|--------|--------|---------|-----------|-----------|
| implement various health interventions  |        |        |         |           |           |
| Avoid repeating the failures of others  | 3(0.7) | 3(0.7) | 19(4.7) | 101(24.8) | 282(69.1) |
| Introduces health planners to new ideas | 3(0.7) | 2(0.5) | 19(4.7) | 107(26.2) | 277(67.9) |

390

391 Table 7 provides information on the obstacles hindering the utilization of health research  
 392 evidence. The variables include Lack of necessary knowledge and training in research,  
 393 Inadequate human and non-human resources, Difficulty in accessing health research evidence,  
 394 Perceptions that health research is for academic purposes, Lack of involvement in research  
 395 activities, and Traditional ways of planning, as well as the minimal usage of health research  
 396 evidence among planning team members at the regional and council levels, and lack of  
 397 dissemination.

398 The data is presented in terms of the number and percentage of participants who strongly  
 399 disagree (SDSA), disagree (DSA), are neutral, agree (AG), and strongly agree (SAGR) with each  
 400 obstacle. This data provides insight into the specific challenges that impact the utilization of  
 401 health research evidence within the context of the study. The highest percentage is for  
 402 "Perceptions that health research is for academic purposes" at 22.6%, and the lowest percentage  
 403 is for "Lack of necessary knowledge and training in research" at 2.9%.

404

405 **Table 7: Obstacles that hinder the utilization of health research evidence**

| Variable                                             | SDSA n (%) | DSA n (%) | Neutral n (%) | AG n (%)  | SAGR n (%) |
|------------------------------------------------------|------------|-----------|---------------|-----------|------------|
| Lack of necessary knowledge and training in research | 12(2.94)   | 18(4.4)   | 7(1.7)        | 67(16.4)  | 304(74.5)  |
| Inadequate human and non-human resources             | 16(3.92)   | 18(4.4)   | 7(1.7)        | 81(19.9)  | 286(70.1)  |
| Difficult in accessing health research evidence      | 36(8.82)   | 41(10.1)  | 24(5.9)       | 110(27.0) | 197(48.3)  |
| Perceptions that health research                     | 92(22.55)  | 40(9.8)   | 16(3.9)       | 81(19.9)  | 179(43.9)  |

|                                                                                                                                            |          |         |         |           |           |
|--------------------------------------------------------------------------------------------------------------------------------------------|----------|---------|---------|-----------|-----------|
| is for academic purposes                                                                                                                   |          |         |         |           |           |
| Lack of involvement in research activities                                                                                                 | 15(3.68) | 25(6.1) | 11(2.7) | 93(22.8)  | 264(64.7) |
| Traditional ways of planning, and Minimal usage of health research evidence among planning team members at the regional and council levels | 36(8.82) | 21(5.2) | 13(3.2) | 92(22.6)  | 246(60.3) |
| lack of dissemination                                                                                                                      | 11(2.70) | 15(3.7) | 17(4.2) | 105(25.7) | 260(63.7) |

406

407

408 **Opportunities for the use of health research evidence**

409 Table 8 indicates the opportunities for the use of health research evidence, helping stakeholders  
 410 to identify areas for improvement and investment to optimize the use of health research  
 411 evidence. The table presents the opportunities for utilizing health research evidence, categorized  
 412 into physical and social opportunities.

413 For physical opportunities, the table highlights the availability of resources such as research  
 414 coordinators, equipment, internet access, a planned budget for research, and the presence of  
 415 symposiums for research discussions. The percentages indicate the distribution of responses,  
 416 ranging from strongly disagree to strongly agree, reflecting the varying levels of agreement  
 417 among the respondents regarding these physical opportunities. In the physical opportunities  
 418 category, the highest percentage is 76.3%, representing the availability of the internet, while the  
 419 lowest percentage is 0.7%, indicating the availability of Internet.

420 In the social opportunities section, the table emphasizes the presence of disparities among  
 421 different populations, the involvement of community members in health planning teams, and the  
 422 enhancement of health literacy in society. The percentages provide an insight into the attitudes  
 423 and perceptions of the respondents toward these social opportunities. In the social opportunities  
 424 category, the highest percentage is 55.9%, reflecting improved health literacy in society, and the

425 lowest percentage is 2.4%, which represents the presence of disparities among different  
 426 populations allowing for more equitable representation.

427 Table 8: Opportunities for the use of health research evidence

| Variable                                                                          | SDSA n (%) | DSA n (%) | Neutral n (%) | AG n (%)  | SAGR n (%) |
|-----------------------------------------------------------------------------------|------------|-----------|---------------|-----------|------------|
| <b>Physical opportunities</b>                                                     |            |           |               |           |            |
| Enabling the utilization of information generated from the healthcare system      | 6(1.4)     | 9(2.1)    | 18(4.3)       | 130(30.8) | 259(61.4)  |
| Availability of research coordinators                                             | 9(2.1)     | 18(4.3)   | 22(5.2)       | 93(22.0)  | 280(66.4)  |
| Availability of equipment                                                         | 4(1.0)     | 16(3.8)   | 21(5.0)       | 88(20.9)  | 293(69.4)  |
| Availability of internet                                                          | 3(0.7)     | 9(2.1)    | 19(4.5)       | 69(16.4)  | 322(76.3)  |
| Availability of planned budget for research                                       | 11(2.6)    | 17(4.0)   | 27(6.4)       | 64(15.2)  | 303(71.8)  |
| Presence of symposiums for research discussions                                   | 9(2.1)     | 17(4.0)   | 23(5.5)       | 106(25.1) | 267(63.3)  |
| <b>Social opportunities</b>                                                       |            |           |               |           |            |
| The presence of disparities among different populations allows for more equitable | 10(2.4)    | 24(5.7)   | 38(9.0)       | 147(34.8) | 203(48.1)  |
| The presence of community members in the health planning teams                    | 11(2.6)    | 28(6.6)   | 55(13.0)      | 119(28.2) | 209(49.5)  |
| Improved health literacy in the society, empowering individuals to make informed  | 4(1.0)     | 19(4.5)   | 18(4.3)       | 145(34.4) | 236(55.9)  |

428

429 **Motivations for the use of health research evidence**

430 Table 9, based on the data presented, we can observe that the automatic motivations for the use  
 431 of health research evidence are primarily centered around the availability of transparency and  
 432 accountability mechanisms 66.4% strongly agreeing, and 23.2% agreeing with the statement

433 availability of job training 73.2% strongly agreeing and 21.3% agreeing respectively. Provision  
 434 of incentives to health planners, with 72.4% strongly agreeing and 15.4% agreeing respectively.  
 435 In contrast, reflective motivations such as continuous quality improvement in the healthcare  
 436 system and the presence of active stakeholder engagement in health planning also garnered  
 437 significant support, with 63.51% and 59.48% strongly agreeing or agreeing, respectively. This  
 438 indicates a strong emphasis on the proactive involvement of various stakeholders and the  
 439 continuous enhancement of the healthcare system based on research evidence.

440

441 Table 9: Motivations of the use of health research evidence

| Variable                                                                                  | SDSA n (%) | DSA n (%) | Neutral n (%) | AG n (%)  | SAGR n (%) |
|-------------------------------------------------------------------------------------------|------------|-----------|---------------|-----------|------------|
| <b>Automatic motivations</b>                                                              |            |           |               |           |            |
| Provision of incentives to health planners                                                | 19(4.5)    | 21(5.0)   | 13(3.1)       | 65(15.4)  | 304(72.0)  |
| Availability of job training                                                              | 3(0.7)     | 4(1.0)    | 16(3.8)       | 90(21.3)  | 309(73.2)  |
| Availability of Short-term courses                                                        | 5(1.2)     | 13(3.1)   | 21(5.0)       | 75(17.8)  | 308(73.0)  |
| Availability of Long-term course                                                          | 18(4.3)    | 24(5.7)   | 24(5.7)       | 105(24.9) | 251(59.5)  |
| <b>Reflective motivations</b>                                                             |            |           |               |           |            |
| Presence of interaction between policymakers, implementers, researchers, and academicians | 3(0.7)     | 17(4.0)   | 21(5.0)       | 111(26.3) | 270(64.0)  |
| Presence of active stakeholder engagement in health planning                              | 6(1.4)     | 16(3.8)   | 33(7.8)       | 116(27.5) | 251(59.5)  |
| Continuous quality improvement in the healthcare system                                   | 1(0.2)     | 10(2.4)   | 12(2.8)       | 131(31.0) | 268(63.5)  |
| Availability of transparency and accountability mechanisms                                | 5(1.2)     | 12(2.8)   | 27(6.4)       | 98(23.2)  | 280(66.4)  |

442

### 443 Findings from document review checklist

444 The analyzed data from Table 10 indicates that the majority of planning teams incorporate  
 445 research evidence into their health plans. A substantial 97.8% of respondents confirmed having a  
 446 current fiscal year health plan, and 98.9% reported having a planning guideline. Most plans

447 include key health frameworks and guides, with 70.8% having the CCHP, 83.2% using the HF  
 448 Planning Guide, and 89.9% incorporating situational analysis. Scientific engagement is  
 449 evidenced by 75.3% of teams receiving invitation letters for conferences. However, challenges  
 450 remain, as only 22.5% have a budget for research, and only 23.6% allocate budget specifically  
 451 for research within the health plan. Additionally, just 28.1% include a research coordinator in the  
 452 planning team, and 43.8% of the plans are well-cited. This highlights a strong foundation in  
 453 research usage but also gaps in financial and personnel support for research-driven planning.

454 Table 10: looking for evidence that planning teams use health research evidence in their plans

| Variable                                                                          | No       | Yes      | Not applicable |
|-----------------------------------------------------------------------------------|----------|----------|----------------|
|                                                                                   | n (%)    | n (%)    | n (%)          |
| Do you have a current fiscal year health plan?                                    | 1(1.1)   | 87(97.8) | 1(1.1)         |
| Do you have a planning guideline?                                                 | 1(1.12)  | 88(98.9) | 0(0.0)         |
| Presence of CCHP                                                                  | 12(13.5) | 63(70.8) | 14(15.7)       |
| HF Planning Guide                                                                 | 13(14.6) | 74(83.2) | 2(2.3)         |
| RHMT guide                                                                        | 26(29.2) | 20(22.5) | 43(48.3)       |
| CHOP                                                                              | 30(33.7) | 24(27.0) | 35(39.3)       |
| Presence of situational analysis in the plan                                      | 8(9.0)   | 80(89.9) | 1(1.1)         |
| Presence of invitation letters to attend various scientific conferences           | 22(24.7) | 67(75.3) | 0(0.0)         |
| Are the well-cited plans                                                          | 50(56.2) | 39(43.8) | 0(0.0)         |
| Is there a budget for research available                                          | 69(77.5) | 20(22.5) | 0(0.0)         |
| Is there a research-allocated budget in their health plan?                        | 68(76.4) | 21(23.6) | 0(0.0)         |
| Is the research coordinator among the planning team members who prepared the plan | 64(71.9) | 25(28.1) | 0(0.0)         |

455

456

457 **Discussion**



458 This study represents the first comprehensive analysis of the use of health research evidence in  
459 Tanzania. It aimed to analyze the determinants of the use of health research evidence by deep-  
460 diving into the three determinants influencing behavior i.e. Capability, Opportunity, and  
461 Motivation. The findings from this study indicated that all three determinants significantly  
462 impact the ability of health planners to use health research evidence during health planning.  
463 However, we found that the use of research evidence is associated with having a degree, more  
464 than 10 years of involvement in health planning activities, and prior knowledge in research. We  
465 found several facilitator determinants such as organizational support infrastructures like, the  
466 availability of computers and the internet, the availability of research experts and research  
467 coordinators, availability of academic institutions that give a chance for dissemination of  
468 research. On the other hand, barrier determinants included lack of human resources, lack of  
469 funding for research activities, lack of necessary knowledge and training, perceptions that  
470 research is for academic purposes, and lack of dissemination.

#### 471 **Proportion of the use of health research evidence**

472 The findings of this study on the proportion of the use of health research evidence demonstrate a  
473 high level of reliance on health research evidence, particularly routine data, during health  
474 planning. The majority of participants (96.7%) reported using routine data, with nearly half  
475 (49.5%) using it extensively, which is consistent with findings from similar studies. For instance,  
476 a study by Lavis et al (22) found that routine data and health statistics are frequently utilized in  
477 policy-making and health-planning processes, underscoring the central role of such data in  
478 evidence-based decision-making. Moreover, the widespread use of health planning guidelines  
479 (98.8%) and the high proportion of participants (98.8%) recognizing the importance of health  
480 research evidence align with findings from studies on the use of research evidence in health  
481 decision-making process which emphasize the role of guidelines and evidence in shaping health  
482 policies (23,24). The high rate of health research evidence use (66.2%) in this study also mirrors  
483 the findings which reported similar levels of research evidence use in healthcare settings(25).  
484 These results highlight the growing recognition and integration of research evidence in health  
485 planning, reflecting broader trends in evidence-informed policymaking across health systems in  
486 Tanzania and globally.

#### 487 **Capability: The knowledge and skills of health research evidence use**

488 Explicitly, capability determinants such as knowledge and skills were found to be critical, with  
489 health planning team members who had higher levels of education (Undergraduate, a master  
490 level, and above) and access to training more likely to use health research evidence to almost  
491 70%, with the capability constraints faces more those with certificate and diploma level, lack of  
492 necessary knowledge and training in research accounts up to 70%, being the most barrier to  
493 utilization of health research evidence, inadequate human and non-human resources, difficult in  
494 accessing research evidence, perception that research is for academic purposes and lack of  
495 dissemination. These findings are consistent with systematic reviews conducted in other low-  
496 and middle-income countries, where similar capability constraints such as poor access to good  
497 quality relevant research, and lack of timely research output have been identified as major  
498 barriers to evidence-based health planning (26,27).

499

## 500 **Opportunities for the use of health research evidence**

501 In comparing our results with existing literature on Opportunity determinants (both physical and  
502 social), it is evident that the availability of resources and institutional support plays a crucial role  
503 in enabling the use of research evidence. Our study revealed that health planning teams with  
504 better access to physical opportunities such as health information system, availability of research  
505 coordinators, equipment, internet, research budgets, presence of symposiums for research  
506 discussion, the existence of academic institutions such as universities, and social opportunities  
507 like the presence of community members representatives within the health planning teams and  
508 improved health literacy in the community were more inclined to utilize research findings in  
509 their work. This aligns with findings from two studies conducted in LMICs (28,29), which  
510 highlighted the importance of institutional support in facilitating the use of research evidence in  
511 health policy. However, our study also noted a distinct challenge in the Tanzanian context with  
512 limited access to relevant health research evidence due to infrastructural constraints, a barrier  
513 less emphasized in studies from more resource-rich settings (30,31).

## 514 **Motivations for the use of health research evidence**

515 Particularly the automatic motivations to utilize health research evidence were also found to be  
516 significant, especially on the provision of incentives to health planners to greater than 72%.

517 Other motivations include job training, and short and long-term courses that influenced the  
518 motivations to use the health research evidence. The automatic motivation factors included the  
519 presence of interaction between policymakers, implementers, researchers, and academicians, and  
520 continuous quality improvement agenda in the health sector. Health planners who perceived the  
521 use of research evidence as beneficial and aligned with their professional goals were more likely  
522 to engage with it actively. This is in line with the COM-B model, which underscores the role of  
523 motivation in behavior change (10). Our findings add to the body of literature by highlighting the  
524 specific motivational barriers in Tanzania, such as a lack of a clear roadmap or framework for  
525 the utilization of health research evidence, which can reduce the enthusiasm for utilizing research  
526 in health planning (32)(33).

## 527 **Document review checklist**

528 The findings from the documents review checklist revealed a high level of integration of research  
529 evidence in health planning aligning with similar studies that underscore the importance of  
530 research-informed frameworks in public health planning (34)(35). The near-universal adoption  
531 of fiscal-year health plans (97.8%) and planning guidelines (98.9%) is consistent with global  
532 trends in evidence-based health planning, which emphasizes standardized planning processes  
533 (36). The presence of documents like CCHP and HF Planning guide mirrors findings from an  
534 urban strategic planning using blue-green infrastructure (37), who highlighted their role in  
535 improving health outcomes, the limited financial resources dedicated to health research in this  
536 study 22.5% suggests a common barrier. Similarly, the low inclusion of research coordinators  
537 (28.1%) echoes observations by a study designed for research approach during learning (38) on  
538 the limited interdisciplinary engagement in health planning. These gaps in budget allocation and  
539 personnel highlight persistent structural challenges to fully operationalizing research evidence-  
540 backed plans, despite a broad commitment to evidence-based frameworks.

541 The study provided valuable insights into the factors influencing the use of health research  
542 evidence during health planning in Tanzania. The results from the binary logistic regression  
543 analysis highlight significant associations between region, level of education, and years of  
544 participation in health planning. Notably, region was a significant predictor, with participants  
545 from regions other than Kilimanjaro demonstrating varying likelihoods of using research

546 evidence, as indicated by the odds ratios. Educational attainment also emerged as a key  
547 determinant; individuals with undergraduate degrees were over twice as likely to use health  
548 research evidence compared to those with a diploma, with statistically significant results (p-value  
549 = 0.029). However, while master's degree holders showed a similar trend, the relationship was  
550 not statistically significant (p-value = 0.0747). The analysis of years of participation revealed  
551 that those with more than 10 years of experience were 40% more likely to use health research  
552 evidence, though this association was not statistically significant. These findings align with other  
553 studies that emphasize the importance of education and experience in evidence-based health  
554 planning (24,26). The adjusted odds ratios and confidence intervals provide a nuanced  
555 understanding of the strength and variability of these associations, contributing to a growing  
556 body of literature on the determinants of research utilization in public health policy and planning.

557 The implications of these findings are essential for improving health planning in Tanzania. To  
558 enhance the use of health research evidence, interventions must address all three determinants:  
559 enhancing the capability of health planners through capacity building, improving opportunities  
560 by ensuring better access to human and non-human resources and organizational support, and  
561 fostering motivation by recognizing and rewarding health planners that use evidence-based  
562 decision-making. These strategies align with recommendations from similar studies in other  
563 LMICs, suggesting that a multifaceted approach including the development of middle range  
564 theory (MRT) outlining the main facilitators for utilization of evidence for malaria treatment  
565 policy in Uganda and the importance of measuring total brain activity in neuroimaging are  
566 essential for promoting the use of research in health planning (39)(40).

## 567 **Conclusion**

568 This study provides a comprehensive assessment of the determinants influencing the use of  
569 health research evidence in Tanzania, focusing on capability, opportunity, and motivation. The  
570 findings demonstrate that all three determinants significantly impact the behavior of health  
571 planners, highlighting those factors such as higher education levels, years of experience in health  
572 planning, and prior research knowledge contribute to greater use of health research evidence.  
573 Organizational infrastructure and institutional support further facilitate this process, while

574 barriers include insufficient human resources, lack of funding, inadequate training, and  
575 perceptions that research is solely for academic purposes.

576 The study also reveals a high reliance on routine data and health planning guidelines, indicating  
577 the growing recognition of research evidence in health decision-making. However, addressing  
578 the barriers to research evidence use will require targeted interventions that strengthen the  
579 capability of health planners, improve access to resources and institutional support, and enhance  
580 motivation through incentives and professional development.

581 Future research should explore the long-term impact of these interventions, as well as contextual  
582 factors like political will and leadership, to fully understand how these determinants collectively  
583 shape health planning behavior. A multifaceted approach i.e. a generic framework for  
584 strengthening Knowledge Management in Tanzania (KMT) that will have a triad pathway:  
585 Capacity building on healthcare workers and researchers, infrastructure development, and  
586 funding that will improve access to health research database and resources within the healthcare  
587 system, and organizational support through the establishment of guidelines for the use of health  
588 research evidence in the decision-making process. This is essential for promoting the use of  
589 health research evidence, ultimately improving health outcomes in Tanzania and other low- and  
590 middle-income countries with similar challenges (41,42)

591

## 592 **Abbreviations**

|         |                                                                    |
|---------|--------------------------------------------------------------------|
| CCHP    | Comprehensive Council Health Planning                              |
| CHOP    | Comprehensive Hospital Operational Plan                            |
| LGAs    | Local Government Authorities                                       |
| LMICs   | Lower-and Middle-Income Countries                                  |
| MoH     | Ministry of Health                                                 |
| PO-RALG | President's Office-Regional Administration and<br>Local Government |
| RHMT    | Regional Health Management Team                                    |

SDGs Sustainable Development Goals

UHC Universal Health Coverage

WHO World Health Organization

593

## 594 **Acknowledgments**

595 We would like to acknowledge the contribution of the University of Dodoma faculty members  
596 from the School of Nursing and Public Health for their input in the process of development of  
597 this manuscript. We would like to express our sincere thanks to the study facilities, the  
598 RHMTs, and the CHMTs for their support. We are grateful to the research assistants (Edmund  
599 Bunyaga, Theresia Ngungulu, Jestina Nyondo, Devina Mafuta Micky Masanyaji, and Ally  
600 Kinyaga) for their assistance during data collection.

## 601 **Author Contributions**

602 PK; Conceptualization, design of the work, data collection and analysis, preparing the  
603 manuscript draft, developing the methodology, results, discussion, and conclusion. RM,  
604 Conceptualization, critically reviewing the methodology and critically reviewing the manuscript,  
605 AK, Conceptualization, critically reviewing the methodology. All authors revised the work and  
606 approved the paper to be submitted for publication.

## 607 **REFERENCES**

- 608 1. Khalid FJI. The Impact of Poor Planning and Management on the Duration of Construction  
609 Projects. Multi-Knowl Electron Compr J Educ Sci Publ [Internet]. 2019;(2):1–20. Available  
610 from: [www.mecsjs.com](http://www.mecsjs.com)
- 611 2. Onwujekwe O, Etiaba E, Mbachu C, Arize I, Nwankwor C, Ezenwaka U, et al. Does  
612 improving the skills of researchers and decision-makers in health policy and systems  
613 research lead to enhanced evidence-based decision making in Nigeria?—A short term  
614 evaluation. Oelke N, editor. PLOS ONE [Internet]. 2020 Sep 3 [cited 2024 Feb  
615 16];15(9):e0238365. Available from: <https://dx.plos.org/10.1371/journal.pone.0238365>
- 616 3. Henriksson DK, Peterson SS, Waiswa P, Fredriksson M. Decision-making in district health  
617 planning in Uganda: Does use of district-specific evidence matter? Health Res Policy Syst.  
618 2019 Jun 6;17(1).

- 619 4. Kagoma P, Mongi R, Kapologwe NA, Kengia J, Kalolo A. Health research evidence: its  
620 current usage in health planning, determinants and readiness to use knowledge translation  
621 tools among health planning teams in Tanzania—an exploratory mixed-methods study  
622 protocol. *BMJ Open* [Internet]. 2024 Jun [cited 2024 Jun 27];14(6):e081517. Available from:  
623 <https://bmjopen.bmj.com/lookup/doi/10.1136/bmjopen-2023-081517>
- 624 5. Kengia JT, Kalolo A, Barash D, Chwa C, Hayirli TC, Kapologwe NA, et al. Research  
625 capacity, motivators and barriers to conducting research among healthcare providers in  
626 Tanzania’s public health system: a mixed methods study. *Hum Resour Health* [Internet].  
627 2023 Sep 5 [cited 2024 Feb 9];21(1):73. Available from: [https://human-resources-](https://human-resources-health.biomedcentral.com/articles/10.1186/s12960-023-00858-w)  
628 [health.biomedcentral.com/articles/10.1186/s12960-023-00858-w](https://human-resources-health.biomedcentral.com/articles/10.1186/s12960-023-00858-w)
- 629 6. Van De Goor I, Hämäläinen RM, Syed A, Juel Lau C, Sandu P, Spitters H, et al.  
630 Determinants of evidence use in public health policy making: Results from a study across six  
631 EU countries. *Health Policy* [Internet]. 2017 Mar [cited 2024 Feb 26];121(3):273–81.  
632 Available from: <https://linkinghub.elsevier.com/retrieve/pii/S0168851017300192>
- 633 7. Van Kammen J, Savigny DD, Sewankambo N. Using knowledge brokering to promote  
634 evidence-based policy-making: the need for support structures. *Bull World Health Organ*.  
635 2006;84(8).
- 636 8. Guilbert JJ. The World Health Report 2006: Working together for health [1]. *Educ Health*  
637 *Change Learn Pract*. 2006;19(3):385–7.
- 638 9. Mboera LEG, Rumisha SF, Mbata D, Mremi IR, Lyimo EP, Joachim C. Data utilisation and  
639 factors influencing the performance of the health management information system in  
640 Tanzania. *BMC Health Serv Res*. 2021;21(1):4–11.
- 641 10. Michie S, van Stralen MM, West R. The behaviour change wheel: A new method for  
642 characterising and designing behaviour change interventions. *Implement Sci*. 2011 Apr  
643 23;6(1).
- 644 11. De Leo A, Bayes S, Bloxsome D, Butt J. Exploring the usability of the COM-B model and  
645 Theoretical Domains Framework (TDF) to define the helpers of and hindrances to evidence-  
646 based practice in midwifery. *Implement Sci Commun* [Internet]. 2021 Dec [cited 2024 Aug  
647 12];2(1):7. Available from:  
648 [https://implementationsciencecomms.biomedcentral.com/articles/10.1186/s43058-020-](https://implementationsciencecomms.biomedcentral.com/articles/10.1186/s43058-020-00100-x)  
649 [00100-x](https://implementationsciencecomms.biomedcentral.com/articles/10.1186/s43058-020-00100-x)
- 650 12. Kapologwe NA, Kalolo A, Kibusi SM, Chaula Z, Nswilla A, Teuscher T, et al.  
651 Understanding the implementation of Direct Health Facility Financing and its effect on  
652 health system performance in Tanzania: A non-controlled before and after mixed method  
653 study protocol. *Health Res Policy Syst*. 2019 Jan 30;17(1).
- 654 13. United THE, Of R. Comprehensive Council Health Planning Guideline Fifth Edition. 2019;
- 655 14. Ministry of Health. Guideline for Developing Comprehensive Hospital Operational Plan (   
656 CHOP ) for Regional Referral Hospitals. 2016;(August).

- 657 15. Mwilike B, Nalwadda G, Kagawa M, Malima K, Mselle L, Horiuchi S. Knowledge of  
658 danger signs during pregnancy and subsequent healthcare seeking actions among women in  
659 Urban Tanzania: a cross-sectional study. *BMC Pregnancy Childbirth* [Internet]. 2018 Dec  
660 [cited 2024 Sep 21];18(1):4. Available from:  
661 <https://bmcpregnancychildbirth.biomedcentral.com/articles/10.1186/s12884-017-1628-6>
- 662 16. Lyimo AA, Guo J, Mushy SE, Mwilike BE. Use of contraceptives and associated factors  
663 among male adolescents in rural secondary schools, Coast Region, Tanzania: a school-based  
664 cross-sectional study. *Contracept Reprod Med* [Internet]. 2024 Mar 1 [cited 2024 Sep  
665 21];9(1):8. Available from:  
666 <https://contraceptionmedicine.biomedcentral.com/articles/10.1186/s40834-024-00268-w>
- 667 17. Wahed T, Kaukab SST, Saha NC, Khan IA, Khanam F, Chowdhury F, et al. Knowledge of,  
668 attitudes toward, and preventive practices relating to cholera and oral cholera vaccine among  
669 urban high-risk groups: findings of a cross-sectional study in Dhaka, Bangladesh. *BMC*  
670 *Public Health* [Internet]. 2013 Dec [cited 2024 Feb 9];13(1):242. Available from:  
671 <https://bmcpublichealth.biomedcentral.com/articles/10.1186/1471-2458-13-242>
- 672 18. Subedi D. Explanatory sequential mixed method design as the third research community of  
673 knowledge claim. *Am J Educ Res*. 2016;4(7):570–7.
- 674 19. Shiyanbola OO, Rao D. Using an exploratory sequential mixed methods design to adapt an  
675 Illness Perception Questionnaire for African Americans with diabetes : the mixed data  
676 integration process. 2021;9(1):796–817.
- 677 20. Surucu L, Maslakci A. Validity and Reliability in Quantitative Research. *Bus Manag Stud*  
678 *Int J*. 2020;8(3):2694–726.
- 679 21. Jiyenze MK, Tundui C, Sirili N, Mollel H. Effects of implementing a health sector strategic  
680 plan : Eidence from Tanzania. *East Afr Med J*. 2022;99(9):5147–55.
- 681 22. Lavis J. Assessing country-level efforts to link research to action. *Bull World Health Organ*  
682 [Internet]. 2006 Aug 1 [cited 2024 Oct 4];84(8):620–8. Available from:  
683 <https://www.ncbi.nlm.nih.gov/pmc/articles/PMC2627430/pdf/16917649.pdf/>
- 684 23. Hanney SR, Kanya L, Pokhrel S, Jones TH, Boaz A. How to strengthen a health research  
685 system: WHO’s review, whose literature and who is providing leadership? *Health Res Policy*  
686 *Syst* [Internet]. 2020 Dec [cited 2024 Oct 4];18(1):72. Available from: [https://health-policy-](https://health-policy-systems.biomedcentral.com/articles/10.1186/s12961-020-00581-1)  
687 [systems.biomedcentral.com/articles/10.1186/s12961-020-00581-1](https://health-policy-systems.biomedcentral.com/articles/10.1186/s12961-020-00581-1)
- 688 24. Orton L, Lloyd-Williams F, Taylor-Robinson D, O’Flaherty M, Capewell S. The Use of  
689 Research Evidence in Public Health Decision Making Processes: Systematic Review. Ross  
690 JS, editor. *PLoS ONE* [Internet]. 2011 Jul 26 [cited 2024 Oct 4];6(7):e21704. Available  
691 from: <https://dx.plos.org/10.1371/journal.pone.0021704>
- 692 25. Innvær S, Vist G, Trommald M, Oxman A. Health policy-makers’ perceptions of their use of  
693 evidence: a systematic review. *J Health Serv Res Policy* [Internet]. 2002 Oct 1 [cited 2024  
694 Oct 3];7(4):239–44. Available from: <https://doi.org/10.1258/135581902320432778>



- 695 26. Oliver K, Innvar S, Lorenc T, Woodman J, Thomas J. A systematic review of barriers to and  
696 facilitators of the use of evidence by policymakers. *BMC Health Serv Res* [Internet]. 2014  
697 Dec [cited 2024 Apr 8];14(1):2. Available from:  
698 <https://bmchealthservres.biomedcentral.com/articles/10.1186/1472-6963-14-2>
- 699 27. Koon AD. A scoping review of the uses and institutionalisation of knowledge for health  
700 policy in low- and middle-income countries. 2020;
- 701 28. Lavis JN, Paulsen EJ, Oxman AD, Moynihan R. Evidence-informed health policy 2 – Survey  
702 of organizations that support the use of research evidence. *Implement Sci*. 2008;3(1):1–17.
- 703 29. Lavis JN, Wilson MG, Grimshaw JM, Haynes RB, Hanna S, Raina P, et al. Effects of an  
704 evidence service on health-system policy makers’ use of research evidence: A protocol for a  
705 randomised controlled trial. 2011;
- 706 30. Moat KA, Lavis JN. 10 best resources for . . . evidence-informed health policy making.
- 707 31. Gavine A. Maximising the availability and use of high-quality evidence for policymaking:  
708 collaborative, targeted and efficient evidence reviews. *PALGRAVE Commun*. 2018;
- 709 32. Armstrong R, Waters E, Dobbins M, Anderson L, Moore L, Petticrew M, et al. Knowledge  
710 translation strategies to improve the use of evidence in public health decision making in local  
711 government: intervention design and implementation plan. *Implement Sci* [Internet]. 2013  
712 Dec [cited 2024 Feb 16];8(1):121. Available from:  
713 <http://implementationscience.biomedcentral.com/articles/10.1186/1748-5908-8-121>
- 714 33. Armstrong JS. *Guidelines for Science: Evidence and Checklists*.
- 715 34. Smith JD, Hasan M. Quantitative approaches for the evaluation of implementation research  
716 studies. *Psychiatry Res* [Internet]. 2020 Jan [cited 2024 Oct 28];283:112521. Available from:  
717 <https://linkinghub.elsevier.com/retrieve/pii/S0165178119307024>
- 718 35. Roberts-Lewis SF, Baxter HA, Mein G, Quirke-McFarlane S, Leggat FJ, Garner HM, et al.  
719 The Use of Social Media for Dissemination of Research Evidence to Health and Social Care  
720 Practitioners: Protocol for a Systematic Review. *JMIR Res Protoc* [Internet]. 2023 May 12  
721 [cited 2024 Oct 28];12:e45684. Available from:  
722 <https://www.researchprotocols.org/2023/1/e45684>
- 723 36. Brown G, Kyttä M, Reed P. Using community surveys with participatory mapping to  
724 monitor comprehensive plan implementation. *Landsc Urban Plan* [Internet]. 2022 Feb [cited  
725 2024 Oct 28];218:104306. Available from:  
726 <https://linkinghub.elsevier.com/retrieve/pii/S0169204621002693>
- 727 37. Sörensen J, Persson AS, Olsson JA. A data management framework for strategic urban  
728 planning using blue-green infrastructure. *J Environ Manage* [Internet]. 2021 Dec [cited 2024  
729 Oct 28];299:113658. Available from:  
730 <https://linkinghub.elsevier.com/retrieve/pii/S0301479721017205>

- 731 38. Lim FV, Nguyen TTH. Design-based research approach for teacher learning: a case study  
732 from Singapore. *ELT J* [Internet]. 2022 Oct 14 [cited 2024 Oct 28];76(4):452–64. Available  
733 from: <https://academic.oup.com/eltj/article/76/4/452/6316630>
- 734 39. Nabyonga-Orem J, Ssengooba F, Macq J, Criel B. Malaria treatment policy change in  
735 Uganda: what role did evidence play? 2014;
- 736 40. Hyder F, Rothman DL. Evidence for the importance of measuring total brain activity in  
737 neuroimaging.
- 738 41. Bennett NJ. Using perceptions as evidence to improve conservation and environmental  
739 management. *Conserv Biol*. 2016;30(3).
- 740 42. Hollingworth SA. What do we need to know? Data sources to support evidence-based  
741 decisions using health technology assessment in Ghana. . *Epidemiology*. 2020;
- 742

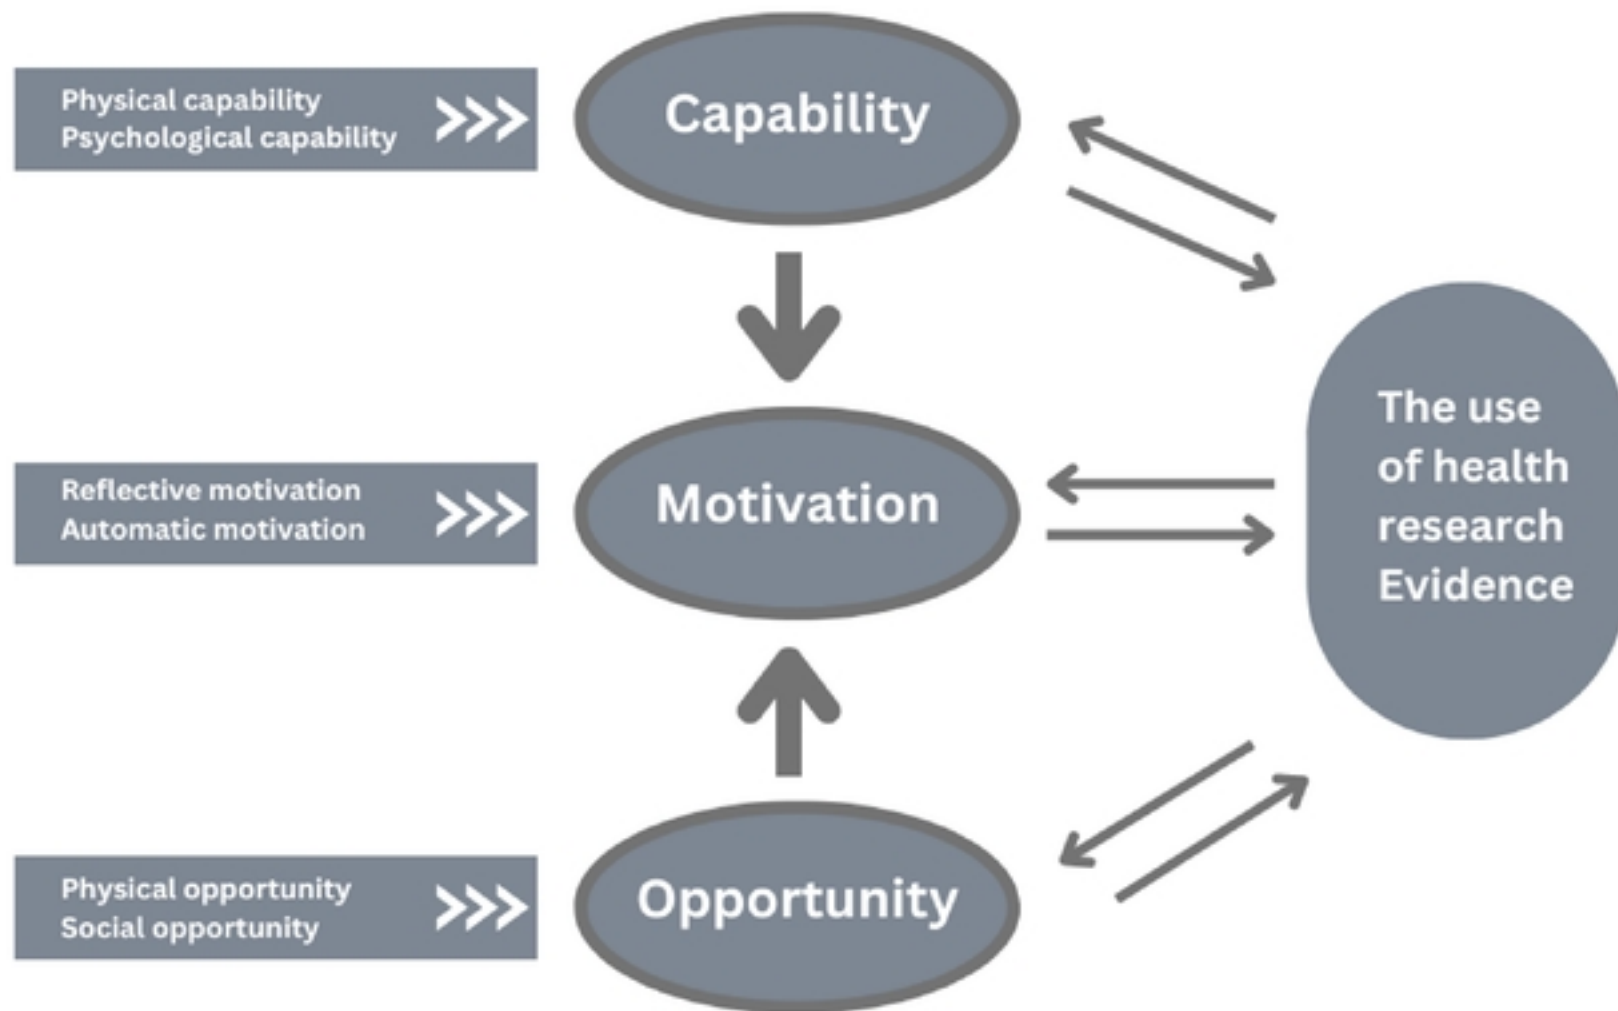

Figure

DISTRIBUTION OF SAMPLED FACILITIES BY ZONES/ REGIONS/DISTRICTS.

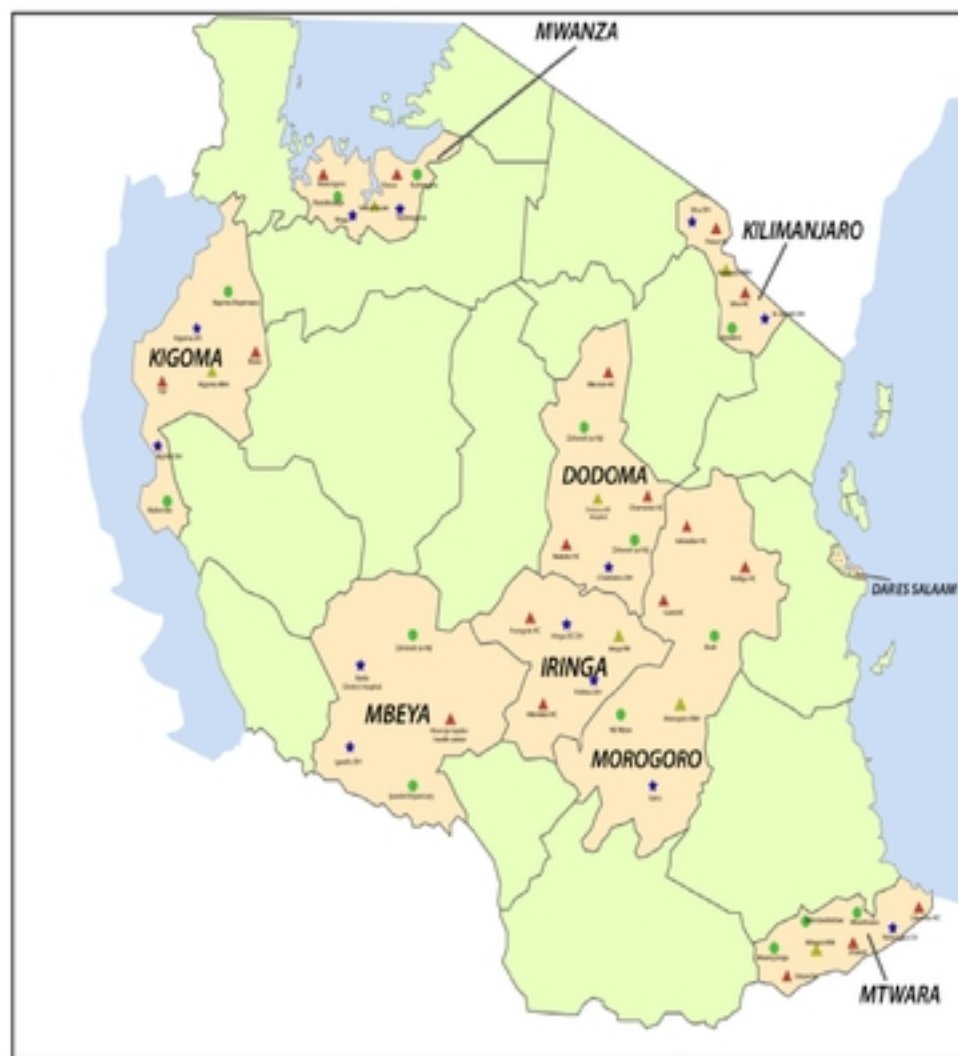

**Legend  
Facilities**

- Regional Hospital
- Council Hospital
- Dispensary
- Health Centre

- Regions
- Selected Regions
- Water Bodies

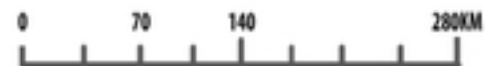

Figure

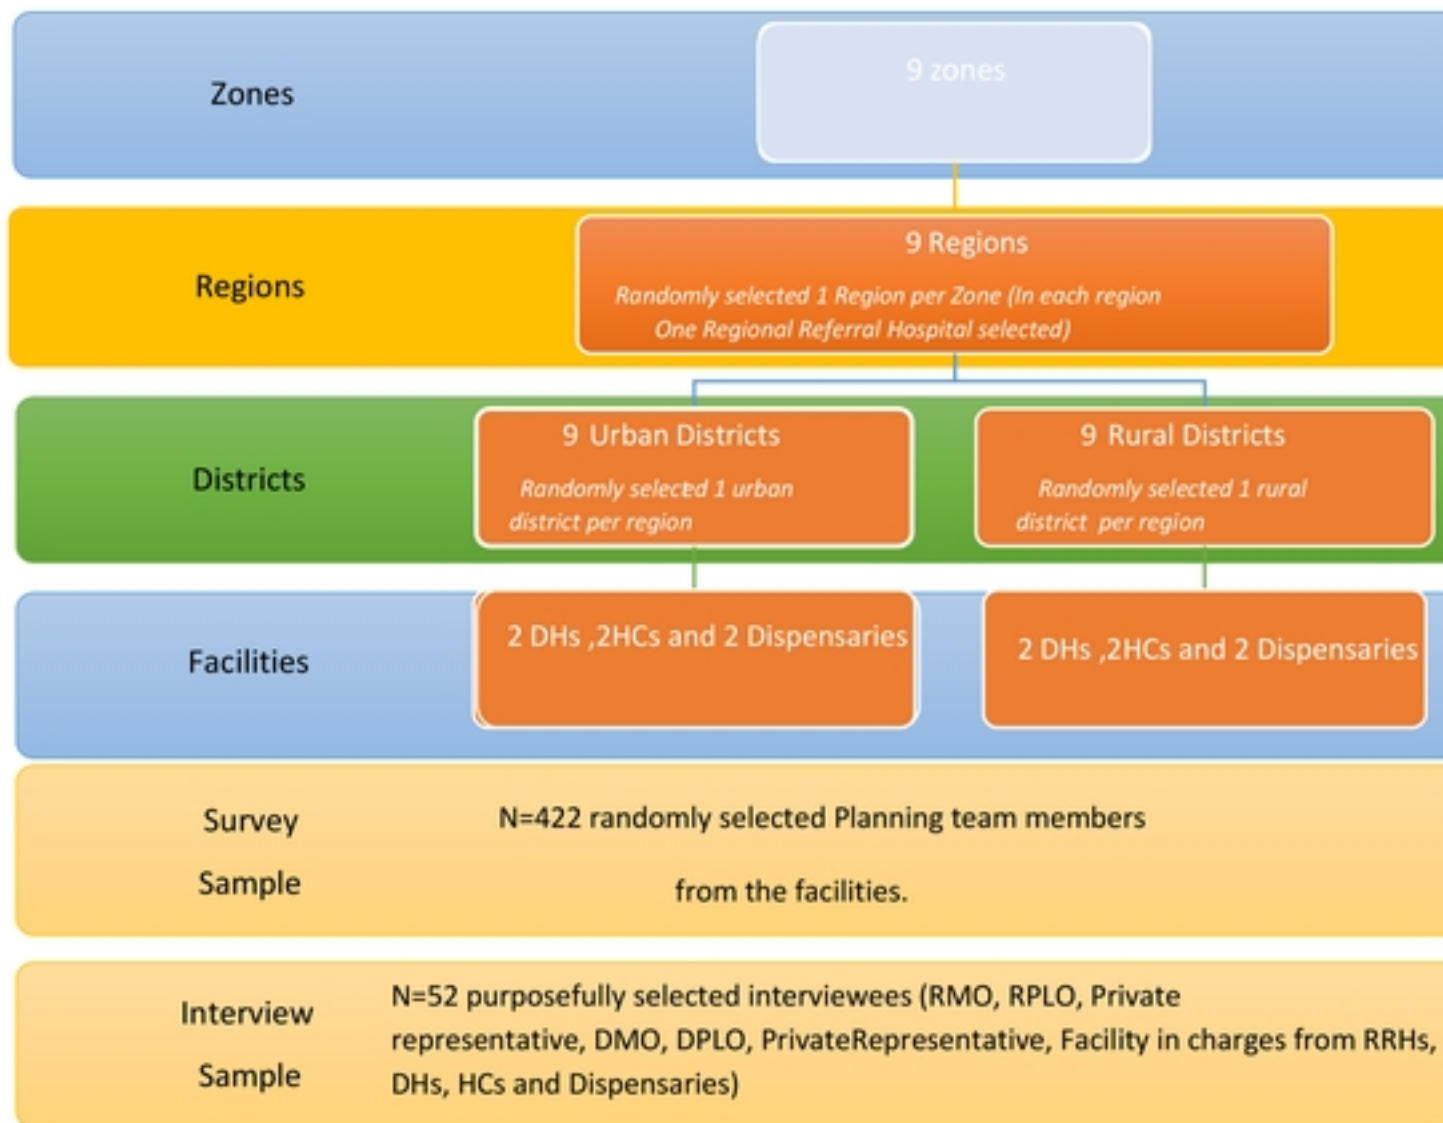

Fig.3 Sampling design

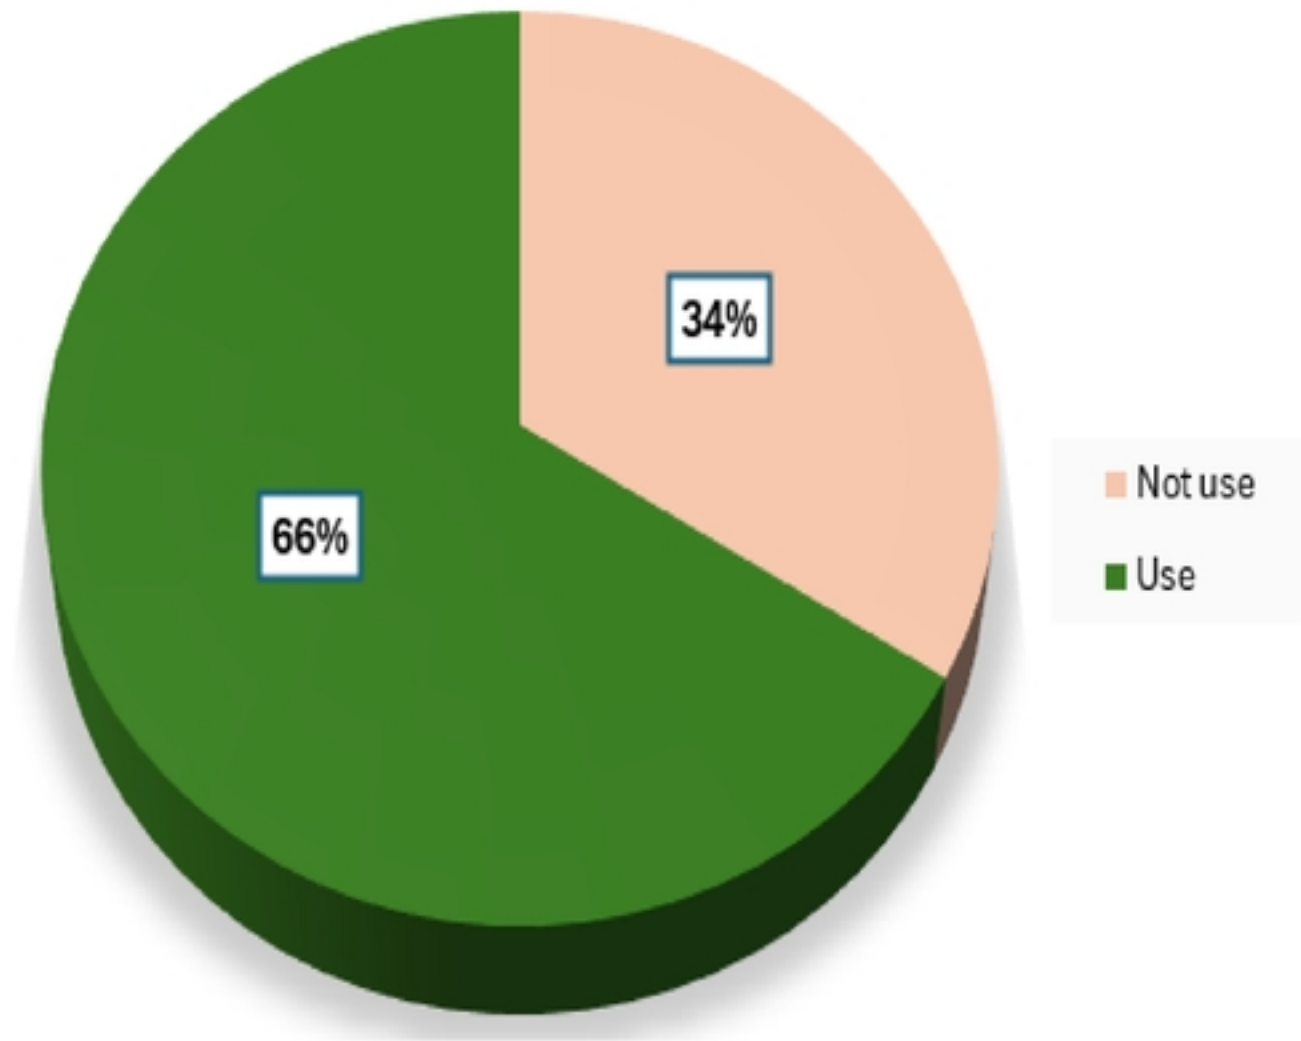

Figure
